# Supplementary material for: Exercise training during pregnancy reduces circulating insulin levels in overweight/obese women postpartum: secondary analysis of a randomised controlled trial (the ETIP trial)
Source: Springer Nature journal article supplement (doi:10.1186/s12884-017-1653-5), 2018-01-08
Supplement: MOESM1 [file 15349918]

**Additional Table 1.** Outcomes at three months postpartum. “Per protocol” model based analyses with baseline mean (all participants at early pregnancy) and comparison between groups are presented as mean, 95% confidence interval (CI) and p-value. Weight retention is estimated based both on the difference between postpartum weight and early pregnancy weight, and between postpartum weight and pre-pregnancy weight.

|                                     | Baseline<br>Mean | Per protocol<br>Exercise Group<br>(n = 19) |              | Control Group<br>(n = 34) |              | Between-Group<br>Comparison |               |             |
|-------------------------------------|------------------|--------------------------------------------|--------------|---------------------------|--------------|-----------------------------|---------------|-------------|
|                                     |                  | Final<br>Mean                              | 95% CI       | Final<br>Mean             | 95% CI       | Mean<br>Diff                | 95% CI        | p-<br>Value |
| <b>Weight (kg)</b>                  | 96.3             | 95.9                                       | 91.8, 100.1  | 94.8                      | 91.0, 98.5   | 1.18                        | -2.05, 4.42   | 0.47        |
| <b>PPWR<sup>1</sup> (kg)*</b>       |                  | -0.1                                       | -3.0, 2.2    | -1.7                      | -3.5, 0.4    | 1.64                        | -1.82, 5.11   | 0.35        |
| <b>PPWR<sup>2</sup> (kg)**</b>      |                  | 2.5                                        | -1.5, 4.8    | 0.2                       | -1.8, 3.1    | 2.32                        | -1.98, 6.61   | 0.28        |
| <b>BMI (kg/m<sup>2</sup>)</b>       | 34.6             | 34.5                                       | 33.1, 35.8   | 34.0                      | 32.8, 35.2   | 0.48                        | -0.70, 1.66   | 0.42        |
| <b>Waist circumference<br/>(cm)</b> | 106.5            | 99.3                                       | 95.6, 103.1  | 104.4                     | 99.9, 109.0  | -5.10                       | -11.66, 1.46  | 0.13        |
| <b>Body composition***</b>          |                  |                                            |              |                           |              |                             |               |             |
| Fat mass (kg)                       | 43.1             | 42.3                                       | 39.1, 44.9   | 42.0                      | 39.2, 44.9   | 0.28                        | -2.46, 3.01   | 0.84        |
| Fat mass (%)                        | 44.8             | 44.3                                       | 42.7, 45.9   | 44.08                     | 42.7, 45.5   | 0.22                        | -1.15, 1.59   | 0.76        |
| Fat-free mass (kg)                  | 52.3             | 51.9                                       | 49.8, 54.0   | 52.6                      | 50.9, 54.4   | -0.74                       | -2.89, 1.41   | 0.50        |
| Fat-free mass (%)                   | 55.3             | 55.6                                       | 53.9, 57.4   | 56.3                      | 54.7, 57.8   | -0.61                       | -2.29, 1.06   | 0.47        |
| <b>Skinfold thickness</b>           |                  |                                            |              |                           |              |                             |               |             |
| Biceps area (mm)                    | 21.2             | 16.4                                       | 13.9, 18.9   | 17.6                      | 15.5, 19.8   | -1.21                       | -3.77, 1.36   | 0.36        |
| Triceps area (mm)                   | 30.0             | 26.6                                       | 24.0, 29.2   | 26.9                      | 24.7, 29.1   | -0.31                       | -3.04, 2.42   | 0.82        |
| Subscapular area (mm)               | 32.1             | 27.9                                       | 25.1, 30.8   | 30.2                      | 27.8–32.6    | -1.29                       | -5.335, 0.78  | 0.14        |
| <b>Blood pressure</b>               |                  |                                            |              |                           |              |                             |               |             |
| Systolic BP (mm/Hg)                 | 124.4            | 117.0                                      | 112.6, 121.4 | 124.0                     | 120.5, 127.5 | -6.98                       | -12.39, -1.56 | 0.01        |
| Diastolic BP (mm/Hg)                | 76.0             | 73.1                                       | 69.8, 76.3   | 78.4                      | 75.8, 81.0   | -5.37                       | -9.29, -1.44  | <0.01       |
| <b>Blood measurements</b>           |                  |                                            |              |                           |              |                             |               |             |
| Fasting glucose (mmol/l)            | 4.8              | 5.0                                        | 4.8, 5.3     | 5.1                       | 4.8, 5.3     | -0.04                       | -0.336, 0.29  | 0.83        |
| 120-min glucose (mmol/l)            | 6.0              | 5.3                                        | 4.6, 6.0     | 5.9                       | 5.3, 6.5     | -0.56                       | -1.44, 1.32   | 0.21        |
| Insulin (pmol/l)                    | 134.0            | 97.9                                       | 66.7, 129.2  | 136.8                     | 112.5, 161.8 | -39.31                      | -75.70, -2.85 | 0.04        |
| HbA1c (%)                           | 5.2              | 5.3                                        | 5.2, 5.55    | 5.4                       | 5.3, 5.5     | -0.09                       | -0.27, 0.10   | 0.35        |
| Insulin C-peptide (nmol/l)          | 0.6              | 0.7                                        | 0.6, 0.8     | 0.7                       | 0.6, 0.8     | -0.00                       | -0.12, 0.12   | 0.99        |
| Triglycerides (mmol/l)              | 1.4              | 0.9                                        | 0.6, 1.2     | 1.0                       | 0.8, 1.2     | -0.12                       | -0.47, 0.23   | 0.51        |
| Ferritin (pmol/l)                   | 116.8            | 62.0                                       | 44.9, 79.3   | 63.8                      | 50.6, 77.7   | -1.71                       | -23.30, 19.91 | 0.88        |
| HDL cholesterol (mmol/l)            | 1.7              | 1.5                                        | 1.3, 1.6     | 1.5                       | 1.4, 1.6     | -0.02                       | -0.18, 0.14   | 0.81        |
| LDL cholesterol (mmol/l)            | 2.9              | 3.2                                        | 2.8, 3.7     | 3.2                       | 2.8, 3.5     | -0.07                       | -0.47, 0.61   | 0.80        |
| Total cholesterol (mmol/l)          | 5.0              | 5.0                                        | 4.5, 5.5     | 5.1                       | 4.7, 5.5     | -0.12                       | -0.72, 0.48   | 0.69        |
| Haemoglobin (g/l)                   | 126.6            | 127.4                                      | 122.9, 131.9 | 129.5                     | 126.0, 130.0 | -2.10                       | -7.60, 3.30   | 0.44        |

|                             |      |     |          |     |          |       |             |      |
|-----------------------------|------|-----|----------|-----|----------|-------|-------------|------|
| High-sensitivity CRP (mg/l) | 10.7 | 4.3 | 2.4, 6.2 | 4.8 | 3.3, 6.2 | -0.49 | -2.86, 1.88 | 0.69 |
| HOMA2-IR                    | 2.5  | 3.1 | 2.2, 4.1 | 4.9 | 3.3, 6.5 | -1.76 | -3.90, 0.37 | 0.06 |
|                             |      |     |          |     |          |       |             |      |

**Missing:** The number of missing in the exercise and the control group varied between 1 and 3.

**Statistics:** The effect of treatment was assessed with linear mixed models. For the primary and secondary outcomes, the effect of time and treatment was taken as a fixed effect. Due to randomization, no systematic differences between groups at baseline were assumed.

**Abbreviations:** PPWR, postpartum weight retention. BMI, Body mass index. BP, blood pressure. HbA1c, Glycated Haemoglobin. HDL, High-density lipoprotein. LDL, Low-density lipoprotein. CRP, C-reactive protein, HOMA2-IR, homeostatic assessment of insulin resistance.

\*PPWR<sup>1</sup>, postpartum weight minus weight at early pregnancy.

\*\*PPWR<sup>2</sup>, postpartum weight minus pre-pregnancy weight. Weight at pre-pregnancy was based on self-reported data. Mean pre-pregnancy weight for all participants were 94.4 kg.

\*\*\*Body composition was measured by air displacement plethysmography (BOD POD).
