# Supplementary material for: Exercise training during pregnancy reduces circulating insulin levels in overweight/obese women postpartum: secondary analysis of a randomised controlled trial (the ETIP trial)
Source: Springer Nature journal article supplement (doi:10.1186/s12884-017-1653-5), 2018-01-08
Supplement: MOESM2 [file 15349918]

**Additional Table 2.** Outcomes at three months postpartum, per protocol. Analysis for the exercise per protocol group and the control group and comparison between groups are presented in number of participants (N), percentage (%), odds ratio (OR), 95% confidence interval (CI), and p-value.

|                                                                                                                                                                                                                                                                                                                                                                                                                                                                                                                                                                                                                                                                                                                                                                                                                                                                                                                                                                                                                              | Per protocol               |                           | Between-Group Comparison |            |           |
|------------------------------------------------------------------------------------------------------------------------------------------------------------------------------------------------------------------------------------------------------------------------------------------------------------------------------------------------------------------------------------------------------------------------------------------------------------------------------------------------------------------------------------------------------------------------------------------------------------------------------------------------------------------------------------------------------------------------------------------------------------------------------------------------------------------------------------------------------------------------------------------------------------------------------------------------------------------------------------------------------------------------------|----------------------------|---------------------------|--------------------------|------------|-----------|
|                                                                                                                                                                                                                                                                                                                                                                                                                                                                                                                                                                                                                                                                                                                                                                                                                                                                                                                                                                                                                              | Exercise group<br>(n = 19) | Control group<br>(n = 34) | Odds Ratio               | 95% CI     | p - value |
|                                                                                                                                                                                                                                                                                                                                                                                                                                                                                                                                                                                                                                                                                                                                                                                                                                                                                                                                                                                                                              | <i>n (%)</i>               | <i>n (%)</i>              |                          |            |           |
| Type 2 diabetes                                                                                                                                                                                                                                                                                                                                                                                                                                                                                                                                                                                                                                                                                                                                                                                                                                                                                                                                                                                                              | 0 (0)                      | 3 (9.1)                   | 0.63*                    | 0.50, 0.78 | 0.54      |
| Hypertension                                                                                                                                                                                                                                                                                                                                                                                                                                                                                                                                                                                                                                                                                                                                                                                                                                                                                                                                                                                                                 | 1 (5.6)                    | 3 (10.0)                  | 1.9                      | 0.18, 19.7 | 1.00      |
| Physical activity $\geq$ 150 minutes/week**                                                                                                                                                                                                                                                                                                                                                                                                                                                                                                                                                                                                                                                                                                                                                                                                                                                                                                                                                                                  | 12 (80.0)                  | 22 (78.6)                 | 0.92                     | 0.19, 4.34 | 1.00      |
| Exercise training***                                                                                                                                                                                                                                                                                                                                                                                                                                                                                                                                                                                                                                                                                                                                                                                                                                                                                                                                                                                                         | 7 (46.7)                   | 7 (25.9)                  | 0.40                     | 0.11, 1.51 | 0.19      |
| Exclusively breastfeeding                                                                                                                                                                                                                                                                                                                                                                                                                                                                                                                                                                                                                                                                                                                                                                                                                                                                                                                                                                                                    | 8 (50.0)                   | 21 (77.8)                 | 3.50                     | 0.92, 13.3 | 0.93      |
| Breastfeeding 3-4 meals/24h                                                                                                                                                                                                                                                                                                                                                                                                                                                                                                                                                                                                                                                                                                                                                                                                                                                                                                                                                                                                  | 3 (18.8)                   | 1 (3.7)                   | 0.17                     | 0.12, 1.76 | 0.14      |
| <p><b>Missing:</b> Type 2 diabetes: Exercise group 1 missing, control group 1 missing. Hypertension: Exercise group 1 missing, control group 4 missing. Physical activity questionnaire: Exercise group 4 missing, control group 6 missing. Lactating questionnaire: Exercise group 3 missing, control group 7 missing.</p> <p><b>Statistics:</b> The data were analyzed by Fisher's Exact test.</p> <p><b>Definitions:</b> Type 2 diabetes: Fasting plasma glucose <math>\geq</math> 7.0 mmol/l or 2 h concentration <math>\geq</math> 11.1 mmol/l, according to the definition of the World Health Organization (WHO). Hypertension: Systolic blood pressure <math>\geq</math> 140, diastolic blood pressure <math>\geq</math> 90.</p> <p>* For cohort control group.</p> <p>**Physical activity <math>\geq</math> 150 minutes/week: 30 minutes of daily physical activity.</p> <p>*** Exercise training <math>\geq</math> 90 min with moderate intensity and/or <math>\geq</math> 45 min with high intensity per week</p> |                            |                           |                          |            |           |
